# Supplementary material
Source: PubMed Central journal article supplement (PMC5119768)
Supplement: NIHMS774864-supplement-supplement_1.pdf [file NIHMS774864-supplement-supplement_1.pdf]

## SUPPLEMENTAL MATERIALS

Table S1. Contemporaneous associations between PD factors and personality trait facets

| Facet                    | General PD | Detachment | Dependency | Dominance | Disinhibition | Compulsivity |
|--------------------------|------------|------------|------------|-----------|---------------|--------------|
|                          | $\beta$    | $\beta$    | $\beta$    | $\beta$   | $\beta$       | $\beta$      |
| <i>Neuroticism</i>       |            |            |            |           |               |              |
| Anxiety                  | .40***     | .02        | .26***     | -.09*     | -.16***       | -.03         |
| Angry Hostility          | .53***     | .08*       | -.09*      | -.11*     | -.07*         | .03          |
| Depression               | .53***     | .00        | .31***     | -.23***   | -.11***       | -.06*        |
| Self-Consciousness       | .34***     | .11**      | .53***     | -.06      | -.05          | -.04*        |
| Impulsiveness            | .34***     | -.16***    | .12**      | .01       | .00           | -.08**       |
| Vulnerability            | .49***     | -.01       | .26***     | -.20***   | -.16***       | -.08**       |
| <i>Extraversion</i>      |            |            |            |           |               |              |
| Warmth                   | -.21***    | -.42***    | -.12**     | .13***    | .00           | -.01         |
| Gregariousness           | -.12**     | -.40***    | -.15***    | .14       | -.03          | -.06*        |
| Assertiveness            | -.05       | -.21***    | -.57***    | .06       | -.03          | .12          |
| Activity                 | -.01       | -.16***    | -.25***    | .16       | -.02          | .14***       |
| Excitement Seeking       | .17***     | -.18***    | -.08*      | .10       | .14***        | .00          |
| Positive Emotions        | -.18***    | -.26***    | -.21***    | .17       | .06*          | .01          |
| <i>Openness</i>          |            |            |            |           |               |              |
| Fantasy                  | .05        | -.11*      | .01        | .10***    | -.05          | -.02         |
| Aesthetics               | .07        | -.14**     | -.09       | .03       | -.07*         | .05          |
| Feelings                 | .09**      | -.22***    | -.11*      | .04       | -.10***       | .02          |
| Actions                  | -.11**     | -.16**     | -.19***    | .01       | -.05          | -.11         |
| Ideas                    | -.04       | -.10*      | -.13**     | .08**     | -.04          | .10**        |
| Values                   | -.11**     | -.34***    | -.02       | -.02      | -.03          | -.03         |
| <i>Agreeableness</i>     |            |            |            |           |               |              |
| Trust                    | -.37***    | -.39***    | .04        | .03       | -.03          | -.01         |
| Straightforwardness      | -.22***    | -.03       | .18***     | -.23***   | -.19**        | -.01         |
| Altruism                 | -.17***    | -.24***    | .04        | -.15***   | -.03          | .00          |
| Compliance               | -.39***    | -.07       | .38***     | .02       | .01           | -.12***      |
| Modesty                  | .02        | .00        | .31***     | -.41***   | -.02          | -.05*        |
| Tender-Mindedness        | -.10**     | -.10*      | .11*       | -.13**    | .02           | -.06         |
| <i>Conscientiousness</i> |            |            |            |           |               |              |
| Competence               | -.33***    | -.08*      | -.28***    | .09       | -.03          | .12***       |
| Order                    | -.06       | .08*       | -.08       | .00       | .04           | .16***       |
| Dutifulness              | -.24***    | .02        | -.09*      | .00       | -.08**        | .17***       |
| Achievement Striving     | -.11**     | -.06       | -.29***    | .09       | -.12***       | .17***       |
| Self-Discipline          | -.22***    | .06        | -.27***    | .03       | .00           | .04          |
| Deliberation             | -.33***    | .07        | .01        | .03       | -.06          | .12***       |

Note. Coefficients standardized, estimated as contemporaneous associations pooled across assessments from a multilevel structural equation model. \* $p < .05$ ; \*\* $p < .01$ ; \*\*\* $p < .001$

Table S2. Means and standard deviations of principal study variables in original scales.

|                             | Baseline |           | Year 2   |           | Year 4   |           | Year 6   |           | Year 10  |           |
|-----------------------------|----------|-----------|----------|-----------|----------|-----------|----------|-----------|----------|-----------|
|                             | <i>M</i> | <i>SD</i> |
| <i>Personality Disorder</i> |          |           |          |           |          |           |          |           |          |           |
| Paranoid                    | 1.49     | 1.69      | 1.06     | 1.54      | 0.77     | 1.30      | 0.93     | 1.55      | 0.90     | 1.53      |
| Schizotypal                 | 1.75     | 1.99      | 1.20     | 1.66      | 0.88     | 1.36      | 0.84     | 1.27      | 0.73     | 1.14      |
| Schizoid                    | 0.93     | 1.12      | 0.63     | 0.96      | 0.57     | 0.95      | 0.70     | 1.08      | 0.65     | 0.99      |
| Avoidant                    | 3.30     | 2.45      | 2.18     | 2.24      | 1.74     | 2.18      | 1.51     | 2.13      | 1.40     | 2.07      |
| Dependent                   | 1.42     | 1.69      | 0.75     | 1.22      | 0.55     | 1.11      | 0.61     | 1.14      | 0.54     | 1.22      |
| Obsessive-Compulsive        | 2.71     | 2.07      | 1.80     | 1.80      | 1.40     | 1.62      | 1.21     | 1.59      | 1.11     | 1.48      |
| Histrionic                  | 0.80     | 1.25      | 0.42     | 0.85      | 0.29     | 0.68      | 0.26     | 0.68      | 0.22     | 0.60      |
| Borderline                  | 3.41     | 2.70      | 2.32     | 2.38      | 1.66     | 2.09      | 1.49     | 1.89      | 1.13     | 1.62      |
| Narcissistic                | 1.16     | 1.69      | 0.70     | 1.28      | 0.36     | 0.87      | 0.43     | 0.96      | 0.34     | 0.87      |
| Antisocial                  | 1.05     | 1.57      | 0.80     | 1.30      | 0.46     | 1.06      | 0.62     | 1.16      | 0.45     | 1.04      |
| <i>Functioning Scales</i>   |          |           |          |           |          |           |          |           |          |           |
| GAF                         | 58.00    | 11.02     | 60.03    | 13.35     | 59.70    | 12.24     | 60.17    | 13.51     | 61.72    | 13.54     |
| Social                      | 3.62     | 0.93      | 3.14     | 1.06      | 3.03     | 1.05      | 3.15     | 1.04      | 2.96     | 1.04      |
| Employment                  | 3.10     | 1.57      | 2.03     | 1.17      | 2.07     | 1.17      | 2.07     | 1.20      | 1.96     | 1.01      |
| Recreation                  | 3.01     | 1.21      | 2.48     | 1.19      | 2.56     | 1.16      | 2.56     | 1.12      | 2.52     | 1.10      |
